# Supplementary material for: Single and Joint Associations of Polycyclic Aromatic Hydrocarbon Exposure with Liver Function during Early Pregnancy
Source: MDPI journal article supplement (doi:10.3390/toxics11100863), 2023-10-16
Supplement: s1 [file s1]

## **SUPPLEMENTAL MATERIAL**

**Single and joint associations of PAHs exposure with liver function during pregnancy: A cross-sectional study**

**Table S1. The quality control of PAHs assay**

| Chemical  | RT (min) | Precursor Ion | Product Ion | CE (eV) | ISTD       | Determination coefficient (R <sup>2</sup> ) | LOD (µg /L) | Recovery (%) | RSD (%) |
|-----------|----------|---------------|-------------|---------|------------|---------------------------------------------|-------------|--------------|---------|
| 1-OHNa-d7 | 15.987   | 223           | 208         | 15      | N/A        | N/A                                         | N/A         | N/A          | N/A     |
| 1-OHNap   | 16.043   | 216           | 201         | 15      | 1-OHNap-D7 | 0.9998                                      | 0.005       | 107.05       | 1.4     |
| 2-OHNap   | 16.547   | 216           | 201         | 15      | 1-OHNap-D7 | 0.9999                                      | 0.0027      | 105.71       | 2.27    |
| 9-OHFlu   | 20.231   | 254           | 165         | 20      | 1-OHNap-D7 | 0.9998                                      | 0.0023      | 94.15        | 2.85    |
| 2-OHFlu   | 22.471   | 254           | 239         | 15      | 1-OHNap-D7 | 0.9998                                      | 0.0029      | 91.99        | 3.18    |
| 4-OHPhe   | 25.209   | 266           | 235         | 25      | 1-OHNap-D7 | 0.9999                                      | 0.0167      | 90.08        | 5.01    |
| 9-OHPhe   | 25.211   | 266           | 73          | 25      | 1-OHNap-D7 | 0.9982                                      | 0.0044      | 105.01       | 4.99    |
| 1-OHPhe   | 25.685   | 266           | 73          | 25      | 1-OHNap-D7 | 0.9998                                      | 0.0071      | 81.09        | 4.96    |
| 3-OHPhe   | 25.854   | 266           | 73          | 25      | 1-OHNap-D7 | 0.9999                                      | 0.0095      | 84.5         | 5.48    |
| 2-OHPhe   | 26.702   | 266           | 73          | 25      | 1-OHNap-D7 | 0.9999                                      | 0.0115      | 68.19        | 2.41    |
| 1-OHPyr   | 30.857   | 290           | 73          | 25      | 1-OHPyr-D9 | 0.9999                                      | 0.0003      | 100.3        | 1.97    |
| 1-OHP-d9  | 31.229   | 299           | 73          | 25      | N/A        | N/A                                         | N/A         | N/A          | N/A     |

Abbreviations: RT, retention time; CE, collision energy; ISTD, internal standard substance; LOD, limit of detection; RSD, relative standard deviation; Internal standard solution: 1-OHNap-d7 and 1-OHP-d9; N/A, not available.

Note: Preparation of internal standard solution: 480ul of 1-OHP-d9 stock solution with a concentration of 0.25mg/ml and 240ul of 1-OHNa-d7 stock solution with a concentration of 5mg/ml were fixed to 24ml with acetonitrile, and the final concentration of 1-OHNa-d7 was 50.9µg/ml, and the final concentration of 1-OHP-d9 was 5µg/ml.

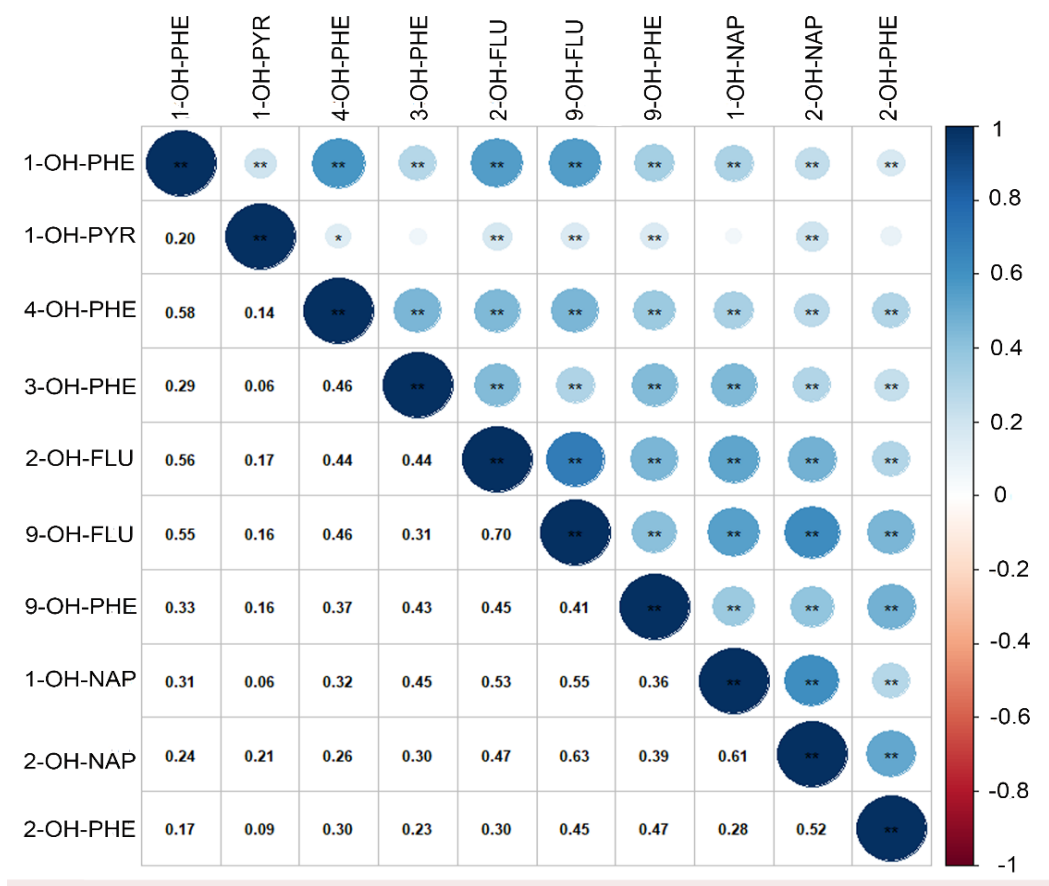

Figure. S1. Pearson correlation analysis of the concentration of PAHs metabolites in the urine of the study population (n=294).  
 $*P < 0.05$ ,  $*P < 0.01$

Table S2. Relationship between urinary polycyclic aromatic hydrocarbons metabolites and liver function parameters when all chemicals were included in the model.

| Analyte (µg/g) | ALT                  |         | AST                 |         |
|----------------|----------------------|---------|---------------------|---------|
|                | %Δ (95% CI)          | P-value | %Δ (95% CI)         | P-value |
| 1-OHPHE        | -1.29 (-6.48, 4.29)  | 0.643   | -0.70 (-3.34, 2.02) | 0.618   |
| 2-OHPHE        | 3.87 (0.30, 7.68)    | 0.033   | 2.22 (0.40, 3.98)   | 0.015   |
| 3-OHPHE        | 0.10 (-4.88, 5.13)   | 0.997   | -0.20 (-2.66, 2.22) | 0.863   |
| 4-OHPHE        | 3.46 (-4.11, 11.52)  | 0.379   | 1.82 (-1.88, 5.65)  | 0.338   |
| 9-OHPHE        | -0.20 (-5.92, 5.97)  | 0.959   | 0.60 (-2.27, 3.56)  | 0.687   |
| 2-OHFLU        | -3.34 (-11.40, 5.44) | 0.441   | -2.47 (-6.57, 1.82) | 0.261   |
| 9-OHFLU        | 2.33 (-2.96, 7.90)   | 0.399   | 1.31 (-1.29, 4.08)  | 0.314   |
| 1-OHNAP        | 1.01 (-2.08, 4.08)   | 0.544   | 0.70 (-0.80, 2.33)  | 0.346   |
| 2-OHNAP        | -2.27 (-5.54, 1.01)  | 0.172   | -0.90 (-2.57, 0.70) | 0.266   |
| 1-OHPYR        | -0.30(-2.66, 2.22)   | 0.834   | -0.30 (-1.49, 0.90) | 0.627   |

  

|         | ALP                 |         | TBA                   |         |
|---------|---------------------|---------|-----------------------|---------|
|         | %Δ (95% CI)         | P-value | %Δ (95% CI)           | P-value |
| 1-OHPHE | 0.50 (-3.54, 4.71)  | 0.822   | 8.65 (1.11, 16.77)    | 0.025   |
| 2-OHPHE | -1.19 (-3.73, 1.51) | 0.391   | 1.21 (-3.44, 6.08)    | 0.618   |
| 3-OHPHE | 1.51 (-2.27, 5.34)  | 0.439   | -3.83 (-9.97, 2.74)   | 0.243   |
| 4-OHPHE | 1.01 (-4.59, 6.93)  | 0.725   | 3.87 (-6.01, 14.80)   | 0.457   |
| 9-OHPHE | -1.19 (-5.54, 3.25) | 0.584   | -2.57 (-9.97, 5.34)   | 0.507   |
| 2-OHFLU | 1.11 (-5.35, 8.00)  | 0.748   | -9.97 (-19.75, 1.11)  | 0.075   |
| 9-OHFLU | 0.10 (-3.83, 4.19)  | 0.956   | 4.19 (-2.86, 11.85)   | 0.247   |
| 1-OHNAP | -0.20 (-2.57, 2.12) | 0.854   | 3.87 (-0.30, 8.22)    | 0.067   |
| 2-OHNAP | -1.29 (-3.73, 1.21) | 0.317   | -4.40 (-8.52, -0.100) | 0.047   |

|         |                     |       |                     |       |
|---------|---------------------|-------|---------------------|-------|
| 1-OHPYR | -0.50 (-2.27, 1.41) | 0.609 | -0.10 (-3.25, 3.15) | 0.929 |
|---------|---------------------|-------|---------------------|-------|

  

| AST/ALT |                     |         |
|---------|---------------------|---------|
|         | %Δ (95% CI)         | P-value |
| 1-OHPHE | 0.70 (-3.05, 4.60)  | 0.725   |
| 2-OHPHE | -1.69 (-4.11, 0.80) | 0.183   |
| 3-OHPHE | -0.10 (-3.54, 3.46) | 0.944   |
| 4-OHPHE | -1.69 (-6.76, 3.77) | 0.541   |
| 9-OHPHE | 0.50 (-3.63, 4.81)  | 0.815   |
| 2-OHFLU | 1.01 (-4.97, 7.36)  | 0.743   |
| 9-OHFLU | -0.90 (-4.50, 2.94) | 0.642   |
| 1-OHNAP | -0.40 (-2.57, 1.82) | 0.732   |
| 2-OHNAP | 1.51 (-0.90, 3.98)  | 0.212   |
| 1-OHPYR | 0.00 (-1.69, 1.71)  | 0.966   |

Abbreviations: ALT, alanine aminotransferase; AST, aspartate aminotransferase; TBA, total bile acid; ALP, alkaline phosphatase  
Adjusted for continuous maternal age, pre-pregnancy BMI, categorical education, parity, ethnicity, passive smoking, household income, and  
Gestational hypertension disorder.

Table S3. Relationship between single polycyclic aromatic hydrocarbon metabolites in urine and liver function parameters (Excluded subjects with urine creatinine concentrations outside the range of 0.3 to 3 g/L, N=287)

| Analyte (µg/g) | ALT                 |                 | AST                 |                 |
|----------------|---------------------|-----------------|---------------------|-----------------|
|                | %Δ (95% CI)         | <i>P</i> -value | %Δ (95% CI)         | <i>P</i> -value |
| 1-OHPHE        | 1.01 (-2.96, 5.13)  | 0.623           | 0.90 (-1.09, 2.94)  | 0.358           |
| 2-OHPHE        | 3.36 (0.40, 86.45)  | 0.027           | 2.22 (0.80, 3.77)   | 0.003           |
| 3-OHPHE        | 0.60 (-3.34, 4.71)  | 0.755           | 0.50 (-1.39, 2.53)  | 0.593           |
| 4-OHPHE        | 3.87 (-1.88, 9.97)  | 0.191           | 2.63 (-0.20, 5.55)  | 0.073           |
| 9-OHPHE        | 1.82 (-2.96, 6.72)  | 0.466           | 1.82 (-0.5, 4.19)   | 0.132           |
| 2-OHFLU        | 0.30 (-5.16, 6.18)  | 0.909           | 0.70 (-2.18, 3.56)  | 0.644           |
| 9-OHFLU        | 1.71 (-1.69, 5.13)  | 0.334           | 1.41 (-0.20, 3.15)  | 0.094           |
| 1-OHNAP        | 0.50 (-1.78, 2.84)  | 0.683           | 0.70 (-0.40, 1.82)  | 0.235           |
| 2-OHNAP        | -0.20 (-2.57, 2.12) | 0.855           | 0.50 (-0.70, 1.61)  | 0.427           |
| 1-OHPYR        | -0.70 (-2.96, 1.61) | 0.891           | -0.50 (-1.59, 0.70) | 0.429           |
|                | ALP                 |                 | TBA                 |                 |
|                | %Δ (95% CI)         | <i>P</i> -value | %Δ (95% CI)         | <i>P</i> -value |
| 1-OHPHE        | -0.10 (-3.05, 2.94) | 0.964           | 7.36 (1.71, 13.20)  | 0.010           |
| 2-OHPHE        | -1.69 (-3.82, 0.50) | 0.136           | 0.10 (-3.92, 4.19)  | 0.977           |
| 3-OHPHE        | 0.40 (-2.47, 3.46)  | 0.769           | -2.57 (-7.69, 2.84) | 0.351           |
| 4-OHPHE        | 0.10 (-4.11, 4.39)  | 0.975           | 5.97 (-1.88, 14.45) | 0.141           |
| 9-OHPHE        | -1.49 (-4.97, 2.02) | 0.395           | -1.49 (-7.6, 5.02)  | 0.650           |
| 2-OHFLU        | -0.60 (-4.78, 3.67) | 0.774           | -1.88 (-9.15, 5.97) | 0.625           |
| 9-OHFLU        | -0.80 (-3.25, 1.71) | 0.534           | 2.63 (-1.88, 7.47)  | 0.257           |
| 1-OHNAP        | -0.70 (-2.37, 1.01) | 0.410           | 1.21 (-1.88, 4.39)  | 0.455           |

|         |                     |                 |                     |       |
|---------|---------------------|-----------------|---------------------|-------|
| 2-OHNAP | -1.69 (-3.44, 0.10) | 0.051           | -1.59 (-4.69, 1.61) | 0.318 |
| 1-OHPYR | -0.40 (-2.08, 1.31) | 0.640           | -0.10 (-3.15, 3.05) | 0.949 |
| AST/ALT |                     |                 |                     |       |
|         | %Δ (95% CI)         | <i>P</i> -value |                     |       |
| 1-OHPHE | -0.10 (-2.86, 2.74) | 0.960           |                     |       |
| 2-OHPHE | -1.09 (-3.15, 1.01) | 0.303           |                     |       |
| 3-OHPHE | -0.10 (-2.86, 2.74) | 0.947           |                     |       |
| 4-OHPHE | -1.19 (-5.07, 2.84) | 0.552           |                     |       |
| 9-OHPHE | 0.10 (-3.25, 3.36)  | 0.979           |                     |       |
| 2-OHFLU | 0.30 (-3.54, 4.39)  | 0.868           |                     |       |
| 9-OHFLU | -0.20 (-2.57, 2.12) | 0.847           |                     |       |
| 1-OHNAP | 0.20 (-1.39, 1.82)  | 0.795           |                     |       |
| 2-OHNAP | 0.70 (-0.9, 2.33)   | 0.408           |                     |       |
| 1-OHPYR | 0.20 (-1.39, 1.82)  | 0.798           |                     |       |

Abbreviations: ALT, alanine aminotransferase; AST, aspartate aminotransferase; TBA, total bile acid; ALP, alkaline phosphatase

Adjusted for continuous maternal age, pre-pregnancy BMI, categorical education, parity, ethnicity, passive smoking, household income, and Gestational hypertension disorder.

Table S4. Posterior inclusion probabilities (PIPs) for each urinary PAHs metabolites included in the BKMR models.

| Analyte  | Group | ALT      |         | AST      |         | TBA      |         |
|----------|-------|----------|---------|----------|---------|----------|---------|
|          |       | groupPIP | condPIP | groupPIP | condPIP | groupPIP | condPIP |
| 1-OH-PHE | 1     | 0.3010   | 0.0558  | 0.3248   | 0.0025  | 0.7778   | 0.8218  |
| 2-OH-PHE | 1     | 0.3010   | 0.4525  | 0.3248   | 0.8947  | 0.7778   | 0.0111  |
| 3-OH-PHE | 1     | 0.3010   | 0.0538  | 0.3248   | 0.0012  | 0.7778   | 0.0206  |
| 4-OH-PHE | 1     | 0.3010   | 0.1003  | 0.3248   | 0.0333  | 0.7778   | 0.0540  |
| 9-OH-PHE | 1     | 0.3010   | 0.0764  | 0.3248   | 0.0191  | 0.7778   | 0.0103  |
| 2-OH-FLU | 2     | 0.1296   | 0.2963  | 0.0274   | 0.1022  | 0.5666   | 0.7656  |
| 9-OH-FLU | 2     | 0.1296   | 0.7037  | 0.0274   | 0.8978  | 0.5666   | 0.2344  |
| 1-OH-NAP | 1     | 0.3010   | 0.1037  | 0.3248   | 0.0289  | 0.7778   | 0.0224  |
| 2-OH-NAP | 1     | 0.3010   | 0.0711  | 0.3248   | 0.0080  | 0.7778   | 0.0414  |
| 1-OH-PYR | 1     | 0.3010   | 0.0864  | 0.3248   | 0.0123  | 0.7778   | 0.0185  |

Abbreviations: ALT, alanine aminotransferase; AST, aspartate aminotransferase; TBA, total bile acid

BKMR models were adjusted for continuous maternal age, pre-pregnancy BMI, categorical education, ethnicity, nation, passive smoking, household income, and Gestational hypertension disorder.

condPIP: The posterior probabilities of particular PAH exposure within their according to groups from the multiple iterations (50,000) of the MICMIC sampler

groupPIP: The posterior probabilities of exposure-included groups from the multiple iterations (50.000) of the MCMC sampler.



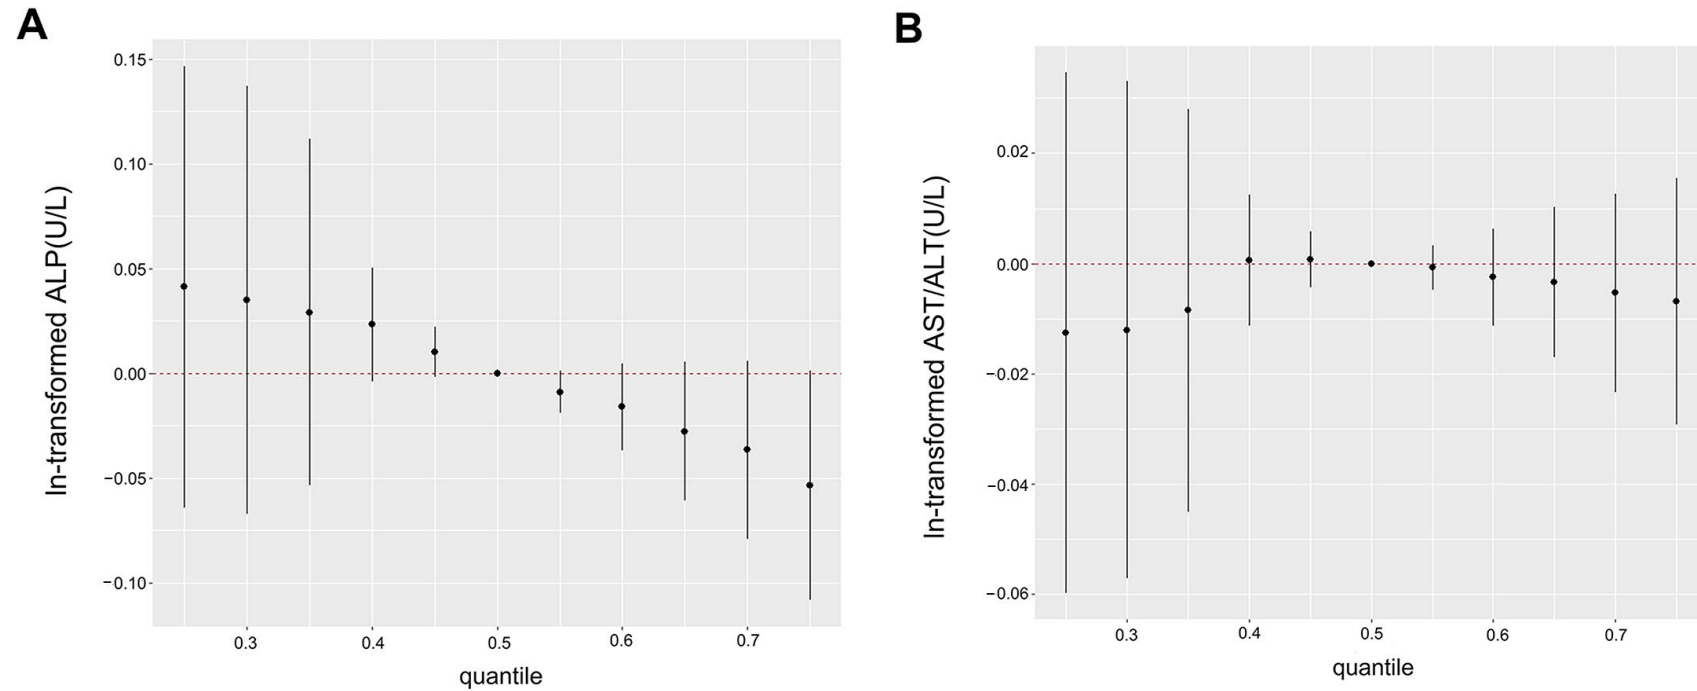

Figure. S2. The joint associations of the PAHs mixture on the ALP (A), AST/ALT (B) levels were estimated by Bayesian Kernel Machine Regression (BKMR). Adjusted for continuous maternal age, pre-pregnancy BMI, categorical education, parity, ethnicity, passive smoking, household income, and hypertension.

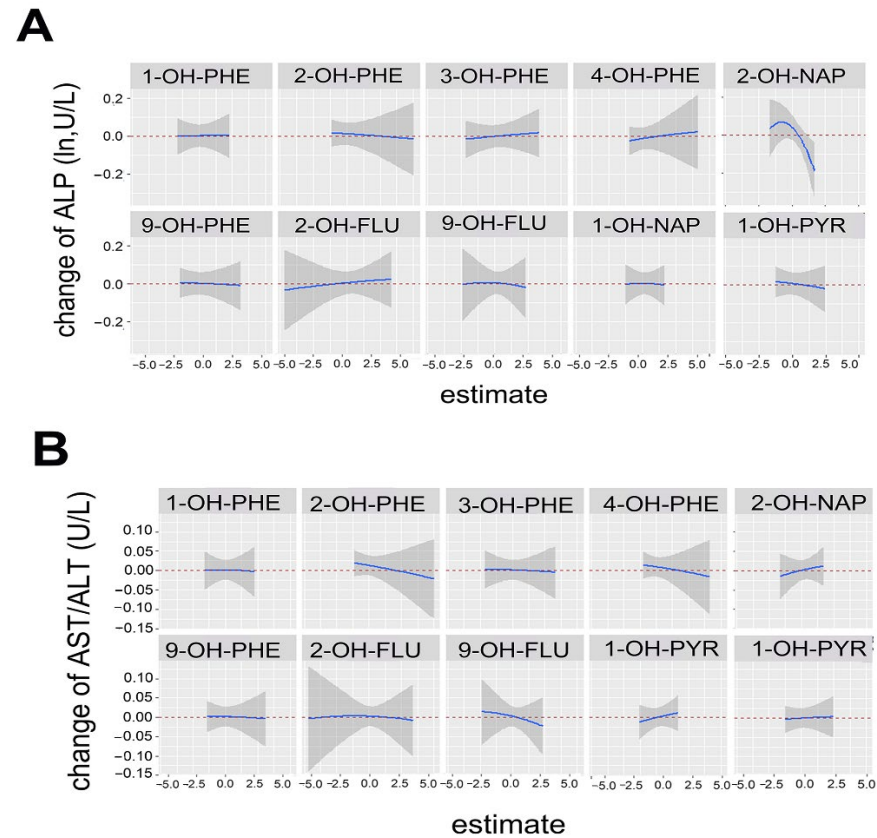

Figure. S3. Univariate exposure-response relationship between the concentration of each substance ALP (A), AST/ALT (B) parameter when other substances are fixed at the median concentration. The model adjusted for continuous maternal age, pre-pregnancy BMI, ethnicity, categorical education, parity, passive smoking, household income, and hypertension.

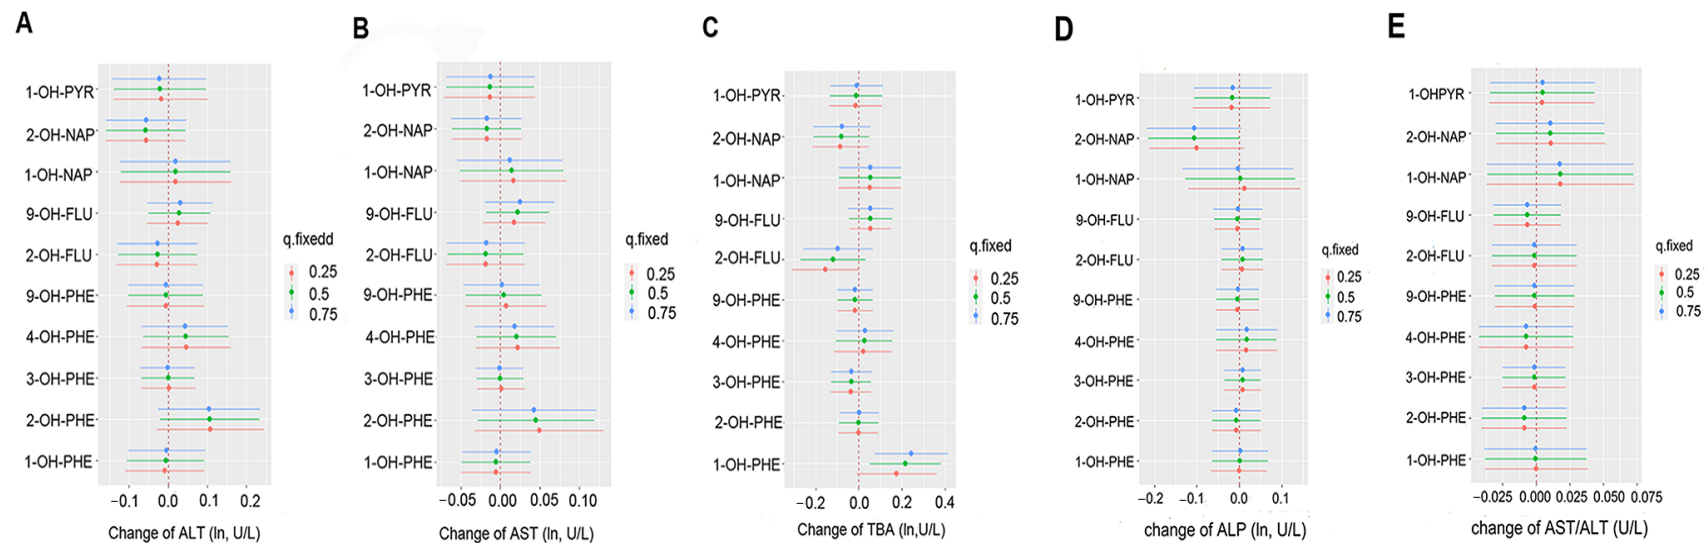

Figure. S4. The association between increased IQR per substance concentration and liver function parameters when other substances were fixed at the 25th, 50th, or 75th percentile, respectively. Adjusted for continuous maternal age, pre-pregnancy BMI, categorical education, ethnicity, nation, passive smoking, household income, and Gestational hypertension disorder.
